# Supplementary material
Source: PubMed Central journal article supplement (PMC7572832)
Supplement: NIHMS1624467-supplement-Supp__Table_1.pdf [file NIHMS1624467-supplement-Supp__Table_1.pdf]

| Figure or results section | Experiment                                                              | Does random effect of litter significantly improve LMM? | Does including heterogenous error variances significantly improve LMM? | Treatment                                             | Sex                                                  | Treatment*Sex                         | Do residuals pass Normality test ( $p > 0.05$ )? | Mann-Whitney U: Exposure                                 | Mann-Whitney U: Sex                                       |
|---------------------------|-------------------------------------------------------------------------|---------------------------------------------------------|------------------------------------------------------------------------|-------------------------------------------------------|------------------------------------------------------|---------------------------------------|--------------------------------------------------|----------------------------------------------------------|-----------------------------------------------------------|
| Figure 1B                 | Effect of ethanol exposure on Catwalk LF/RH coupling                    | No                                                      | Yes                                                                    | $F(1,45.903) = 18.822$<br>$p < 0.0001$<br>$g = 1.127$ | $F(1,45.903) = 1.039$<br>$p = 0.3134$<br>$g = 0.279$ | $F(1,45.903) = 2.208$<br>$p = 0.1442$ | Yes                                              | -                                                        | -                                                         |
| Figure 2                  | Effect of ethanol exposure on Triple Horizontal Bar cumulative time     | No                                                      | No                                                                     | $F(1,60) = 4.805$<br>$p = .0323$<br>$g = 0.505$       | $F(1,60) = 0.674$<br>$p = 0.4151$<br>$g = 0.209$     | $F(1,60) = 1.280$<br>$p = 0.2624$     | Yes                                              | -                                                        | -                                                         |
| Figure 3A                 | Effect of ethanol exposure on Rotorod time to fall- training day        | Yes                                                     | Yes                                                                    | $F(1,10.277) = 0.723$<br>$p = 0.4145$<br>$g = 0.263$  | $F(1,43.097) = 0.886$<br>$p = 0.3519$<br>$g = 0.033$ | $F(1,43.097) = 0.244$<br>$p = 0.6241$ | No                                               | $U(n1 = 28, n2 = 33) = 425,$<br>$p = 0.5923, r = 0.069$  | $U(n1 = 36, n2 = 25) = 443,$<br>$p = 0.9182, r = 0.013$   |
| Figure 3B                 | Effect of ethanol exposure on Rotorod time to fall- test day            | No                                                      | No                                                                     | $F(1,58) = 4.875$<br>$p = .0312$<br>$g = 0.619$       | $F(1,58) = 1.724$<br>$p = 0.1944$<br>$g = 0.333$     | $F(1,58) = 1.474$<br>$p = 0.2297$     | No                                               | $U(n1 = 30, n2 = 32) = 324.5,$<br>$p = .0285, r = 0.278$ | $U(n1 = 37, n2 = 25) = 372.5,$<br>$p = 0.1965, r = 0.164$ |
| Figure 3C                 | Effect of ethanol exposure on Rotorod RPMs before falling- training day | Yes                                                     | Yes                                                                    | $F(1,10.396) = 0.926$<br>$p = 0.3578$<br>$g = 0.308$  | $F(1,43.678) = 1.200$<br>$p = 0.2794$<br>$g = 0.002$ | $F(1,43.678) = 0.344$<br>$p = 0.5607$ | No                                               | $U(n1 = 28, n2 = 33) = 412,$<br>$p = 0.4690, r = 0.093$  | $U(n1 = 36, n2 = 25) = 447,$<br>$p = 0.9649, r = 0.006$   |
| Figure 3D                 | Effect of ethanol exposure on Rotorod RPMs before falling- test day     | No                                                      | No                                                                     | $F(1,58) = 5.797$<br>$p = .0193$<br>$g = 0.674$       | $F(1,58) = 1.334$<br>$p = 0.2528$<br>$g = 0.292$     | $F(1,58) = 1.501$<br>$p = 0.2255$     | No                                               | $U(n1 = 30, n2 = 32) = 311.5,$<br>$p = .0176, r = 0.302$ | $U(n1 = 37, n2 = 25) = 386.5,$<br>$p = 0.2752, r = 0.139$ |

**Supplemental Table 1: Detailed statistics from LMM analyses.** Specifics from LMM model construction are presented, showing if including random intercepts for litter or heterogenous error variances for exposure condition significantly improved each LMM. F-ratios and p-values are presented for treatment and sex effects, including Hedges' g effect sizes for main effects. Mann-Whitney U tests are shown for exposure and sex effects from any LMM with residuals that did not pass ( $p > 0.05$ ) the Shapiro-Wilkes normality test. Effect sizes for Mann-Whitney U tests are shown as r.
